# Supplementary material
Source: Springer Nature journal article supplement (https://www.springerprofessional.de/resource/supplementary/13638_2011_514_MOESM2_ESM.pdf/11897982)
Supplement: MOESM2 [file 11897982]

$\mu_x(BR_{diff}(i,j))$ 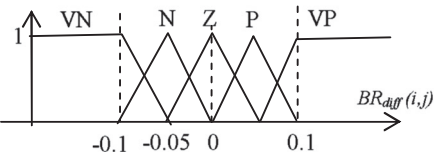 $\mu_x(Margin_{PBGT}(i,j))$ 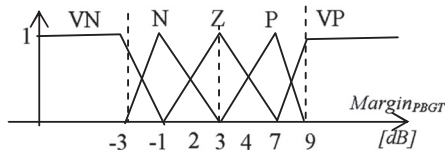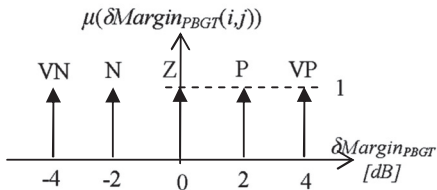

(a)

| $BR_{diff}(i,j)$ | $Margin_{PBGT}(i,j)$ | $\delta Margin_{PBGT}(i,j)$ |
|------------------|----------------------|-----------------------------|
| VP               | -                    | VN                          |
| P                | -                    | N                           |
| N                | -                    | P                           |
| VN               | -                    | VP                          |
| Z                | VN                   | P                           |
| Z                | N                    | P                           |
| Z                | P                    | N                           |
| Z                | VP                   | N                           |
| Z                | Z                    | Z                           |

(b)
